# Supplementary material for: Automatically detecting bregma and lambda points in rodent skull anatomy images
Source: PubMed Central journal article supplement (PMC7771702; doi:10.1371/journal.pone.0244378), 2020-12-29
Supplement: pone.0244378.s001.pdf [file pone.0244378.s001.pdf]

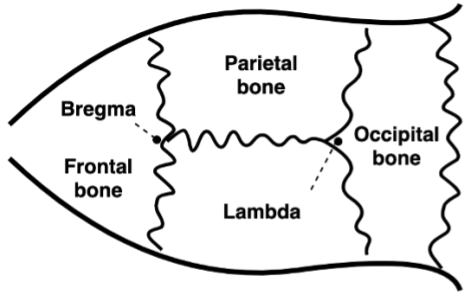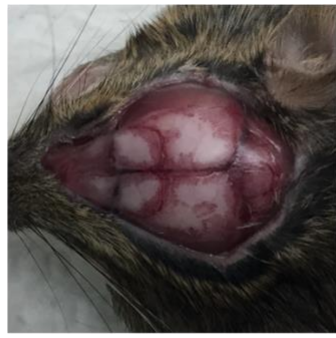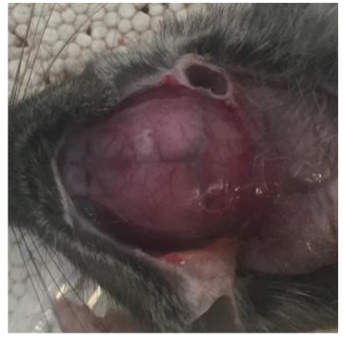

(a)

(b)

(c)

Fig 1

head - tail

head - tail

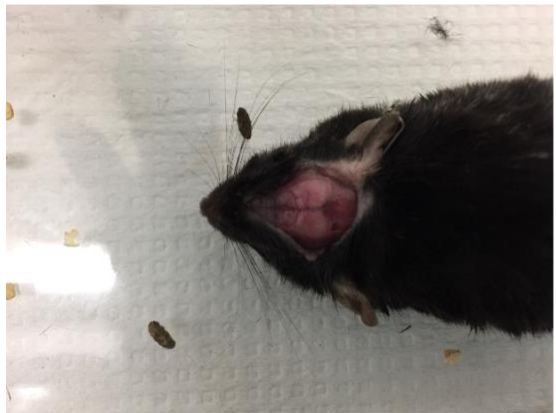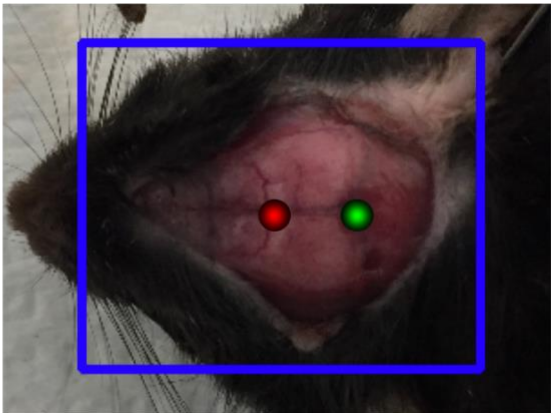

left - right

left - right

(a)

(b)

Fig 2

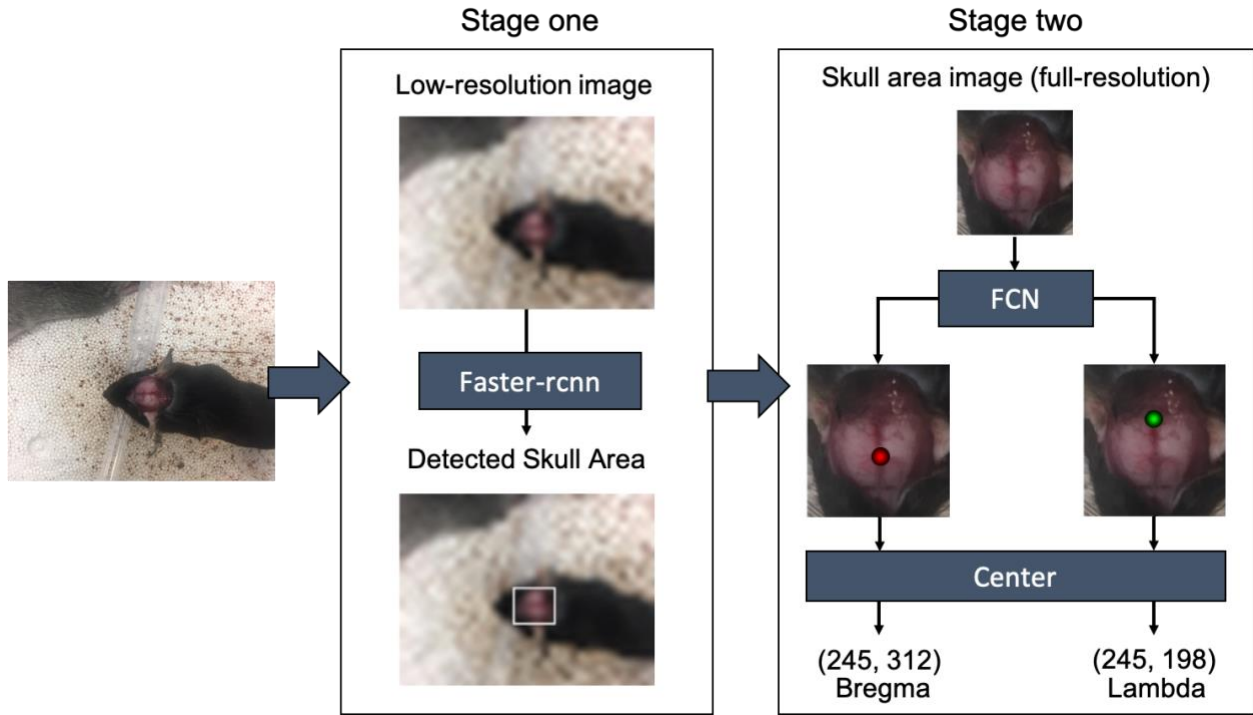

Fig 3

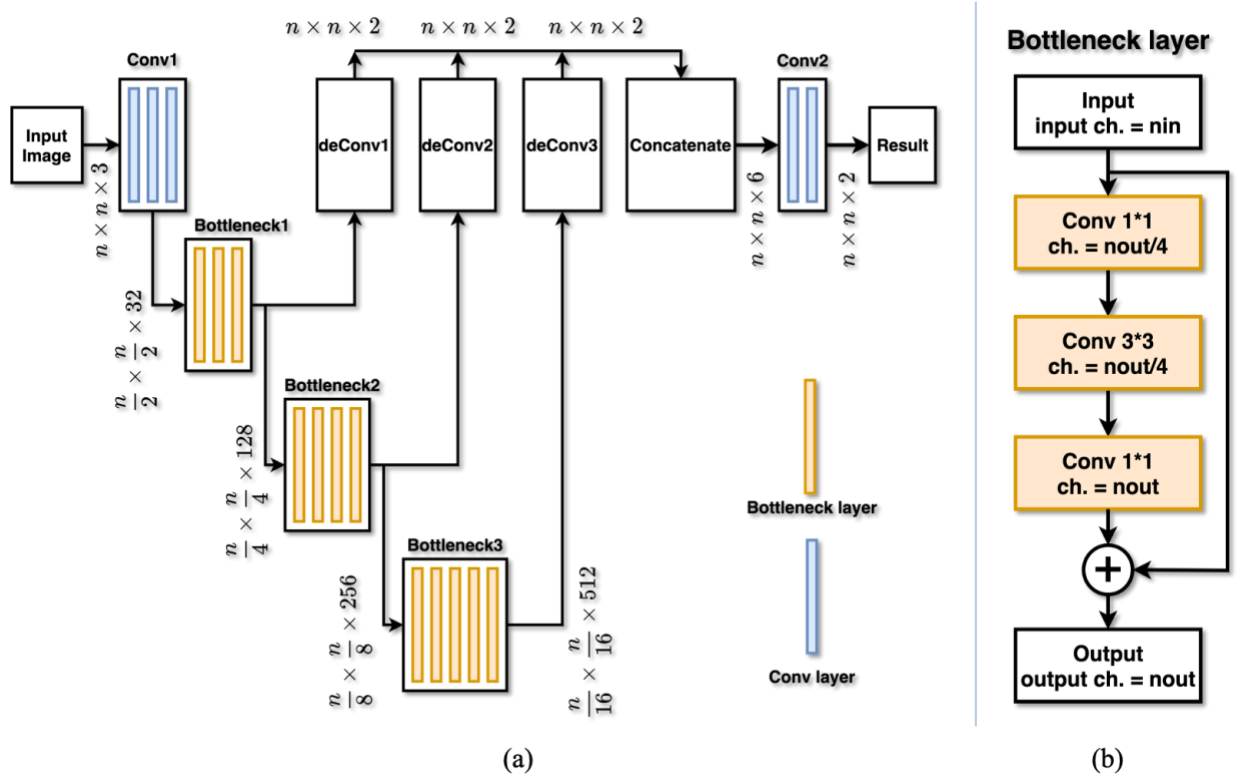

Fig 4

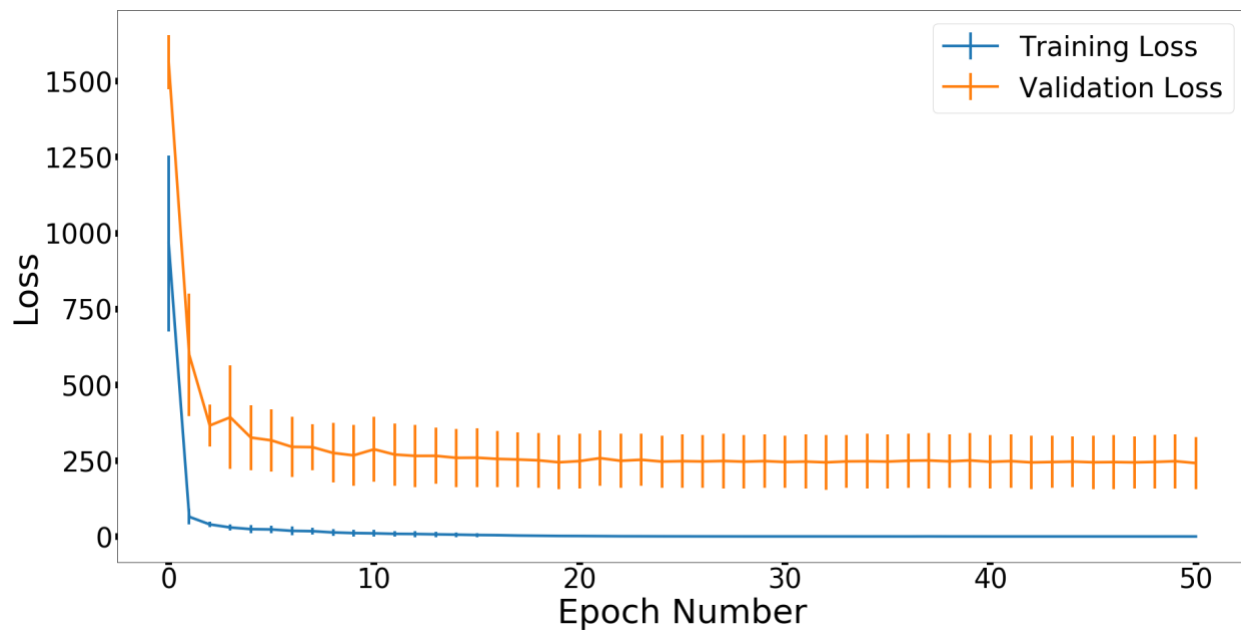

Fig 5

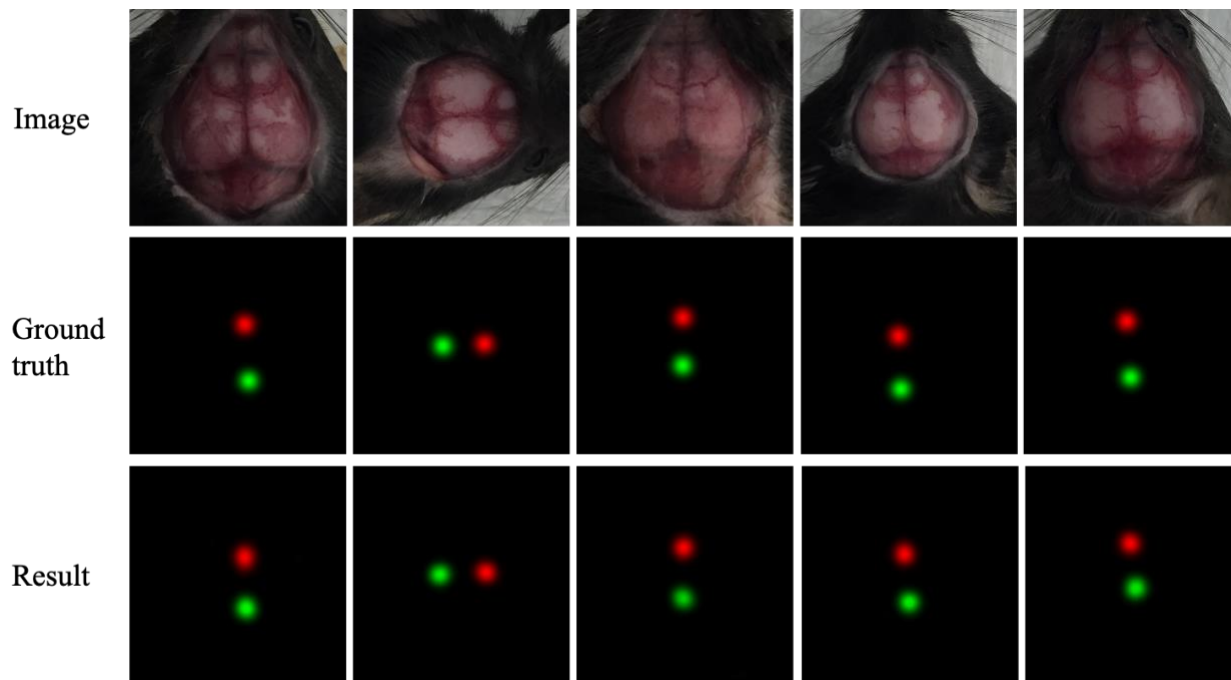

Fig 6

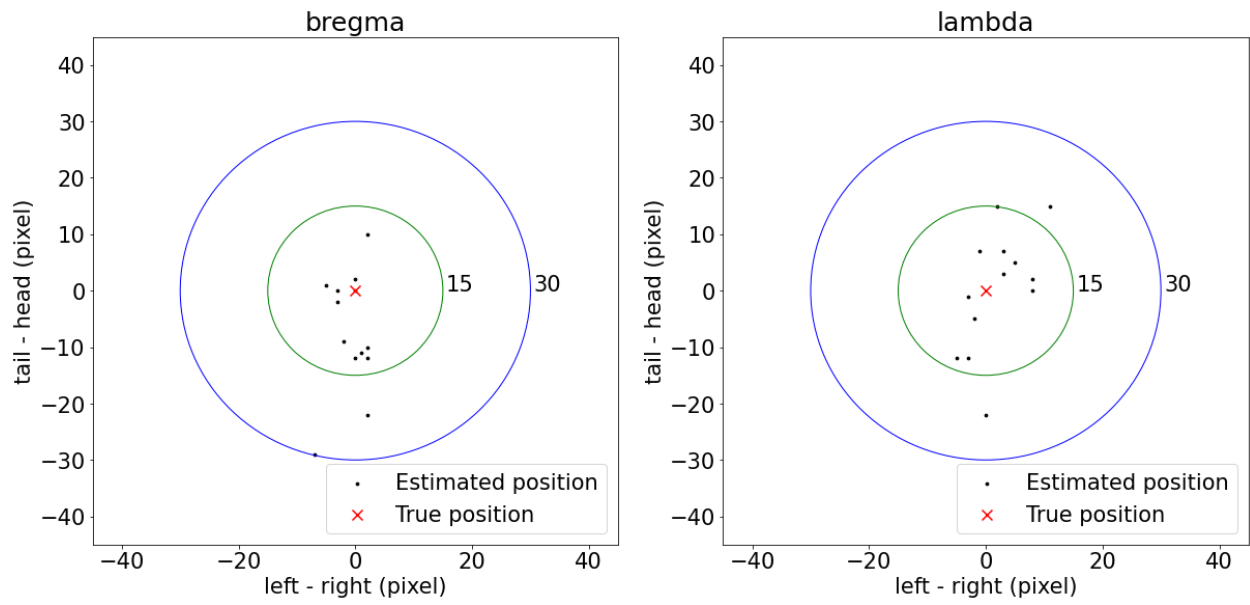

Fig 7
